# Supplementary material for: A selective electrochemical chiral interface based on a carboxymethyl-β-cyclodextrin/Pd@Au nanoparticles/3D reduced graphene oxide nanocomposite for tyrosine enantiomer recognition
Source: Royal Society of Chemistry journal article supplement (doi:10.1039/d1an02262h), 2022-01-01
Supplement: d1an02262h1.pdf [file d1an02262h1.pdf]

Electronic Supplementary Material (ESM) for Analyst.  
This journal is © The Royal Society of Chemistry 2021

## Supporting information

### **A selective electrochemical chiral interface based on carboxymethyl- $\beta$ -cyclodextrin/Pd@Au nanoparticles/3D reduced graphene oxide nanocomposite for tyrosine enantiomers recognition**

Qingfang Niu<sup>1</sup>, Pengyue Jin<sup>2</sup>, Yu Huang<sup>1</sup>, Lifang Fan<sup>1</sup>, Caihong Zhang<sup>1</sup>, Cheng Yang<sup>2\*</sup>, Chuan Dong<sup>1</sup>, Wenting Liang<sup>1\*</sup>, Shaomin Shuang<sup>1\*</sup>

<sup>1</sup> *Institute of Environmental Sciences, Department of Chemistry, Shanxi University, Taiyuan 030006, China.*

<sup>2</sup> *College of Chemistry, Sichuan University, 29 Wangjiang Road, Chengdu 610064, China*

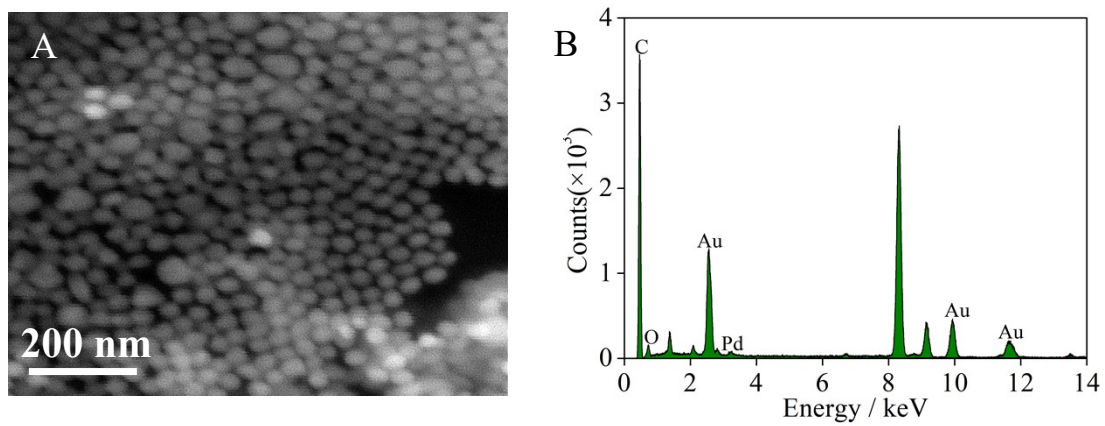

**Fig. S1** SEM image (A) and EDS spectrum (B) of Pd@Au NPs.

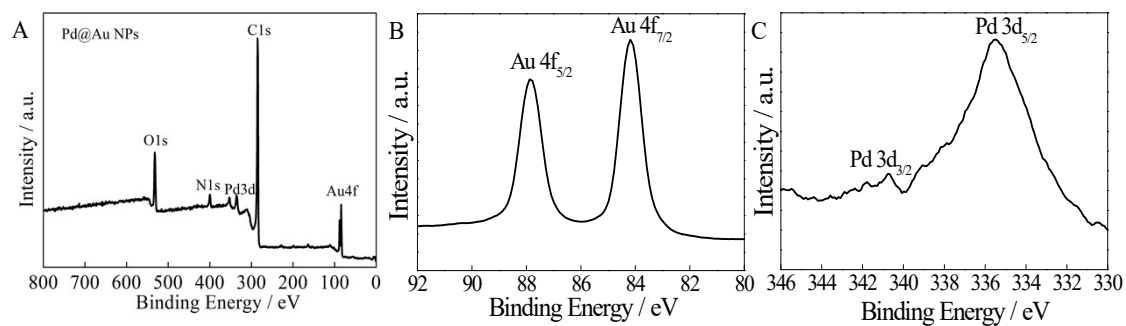

**Fig. S2** XPS spectra of Pd@Au NPs.

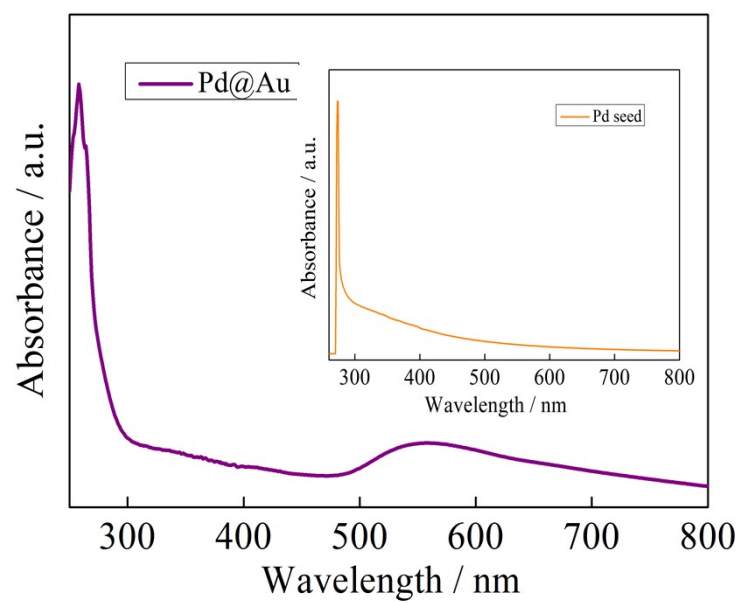

**Fig. S3** UV-vis absorption of Pd@Au NPs. The insert is UV-vis absorption of Pd seeds.

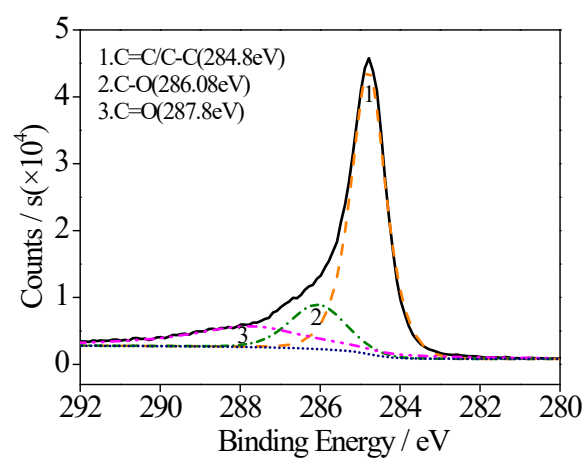

**Fig. S4** XPS C 1s spectrogram for 3D-rGO/Pd@Au.

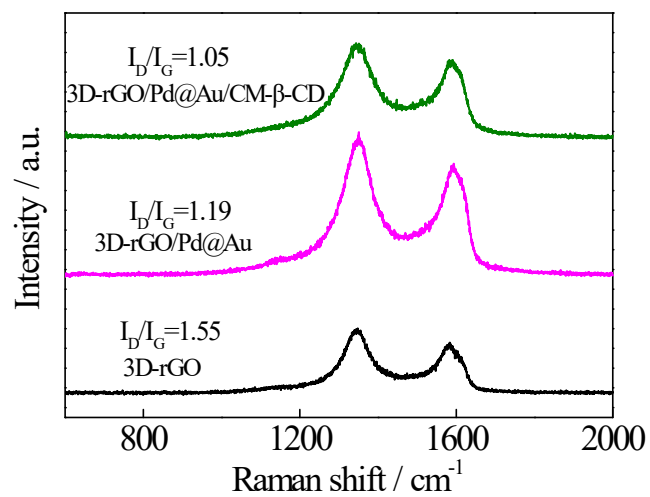

**Fig. S5** Raman spectra for 3D-rGO, 3D-rGO/Pd@Au and 3D-rGO/Pd@Au/ CM-β-CD.

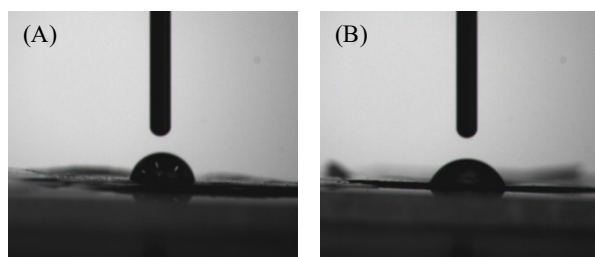

**Fig. S6** Contact-angle photographs of 3D-rGO/Pd@Au (a) and 3D-rGO/Pd@Au/CM-β-CD (b) modified substrates.

The contact angles for water of 3D-rGO/Pd@Au and 3D-rGO/Pd@Au/CM-β-CD film were measured to be 84.6° and 71°, respectively (Fig. S6a and 6b). Among two material films, 3D-rGO/Pd@Au displays relatively strong hydrophobic interface with the higher contact angle due to the reduction of the hydrophilic oxygen-containing groups from GO. The smaller contact angle of the 3D-rGO/Pd@Au/CM-β-CD film relative to 3D-rGO/Pd@Au manifests its weaker hydrophobic, which is explained by the hydrophilic groups of the water-soluble CM-β-CD molecules.

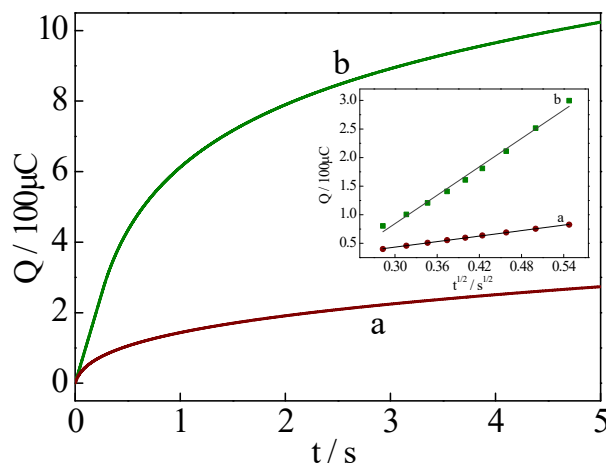

**Fig. S7** Plot of  $Q$ - $t$  curves of GCE (a) and 3D-rGO/Pd@Au/CM-β-CD/GCE (b) in 0.1 mM  $\text{K}_3[\text{Fe}(\text{CN})_6]$  containing 1.0 M KCl. Inset: Plot of  $Q$ - $t^{1/2}$  curves on GCE (a) and 3D-rGO/Pd@Au/CM-β-CD/GCE (b).

In Fig. S7, the effective surface areas,  $A$  of bare GCE and 3D-rGO/Pd@Au/CM-β-CD/GCE were calculated according to the following equation:

$$Q = 2nFAcD^{1/2}t^{1/2}/\pi^{1/2} + Q_{dl} + Q_{ads}$$

where  $Q$  is the capacitive charge of the measured electrode surface at  $t$ ,  $n$  is the number of electron transfer,  $F$  ( $\text{C}\cdot\text{mol}^{-1}$ ) is the Faraday constant,  $A$  ( $\text{cm}^2$ ) stands for the surface area of the electrode,  $c$  ( $\text{mol}\cdot\text{cm}^{-3}$ ) represents the concentration of substrate,  $D$  ( $\text{cm}^2\cdot\text{s}^{-1}$ ) is the diffusion coefficient,  $Q_{dl}$  is the double layer charge and  $Q_{ads}$  is the adsorption charge. It turns out that  $A$  is  $0.1071\text{ cm}^2$  for bare GCE and  $0.5523\text{ cm}^2$  for 3D-rGO/Pd@Au/CM-β-CD/GCE.

## Optimization of recognition conditions

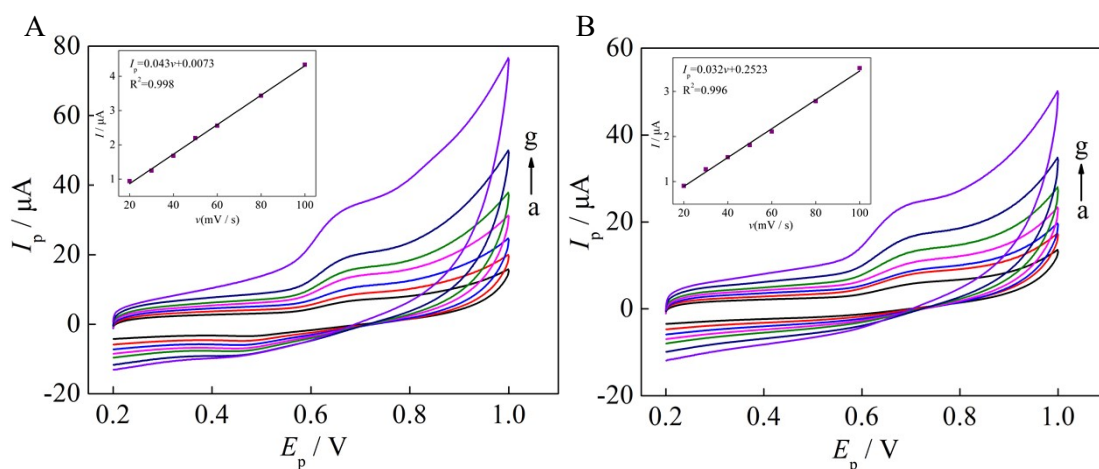

**Fig. S8** CVs of 3D-rGO/Pd@Au/CM-β-CD/GCE for (A) L-Tyr and (B) D-Tyr (1.0 mM, containing 0.1 M PB, pH 7.0) at different scan rate (20, 30, 40, 50, 60, 80 and 100 mV s<sup>-1</sup>, scanned from 0.2 to 1.0 V; the insert curve of  $I_p$  (oxidation peak current) versus scan rate ( $v$ ) of L-Tyr and D-Tyr at 3D-rGO/Pd@Au/CM-β-CD/GCE.

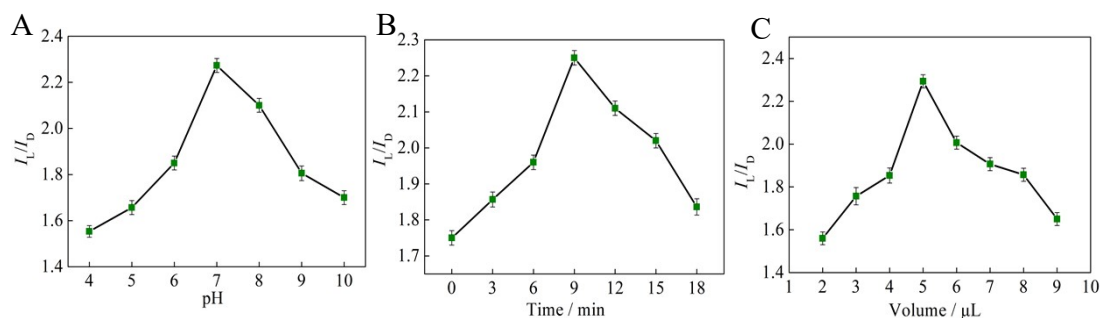

**Fig. S9** Influence of pH (A), the volume (B) and the accumulation time (C) on the enantioselectivity ( $I_L/I_D$ ) of 3D-rGO/Pd@Au/CM-β-CD toward Tyr isomers.

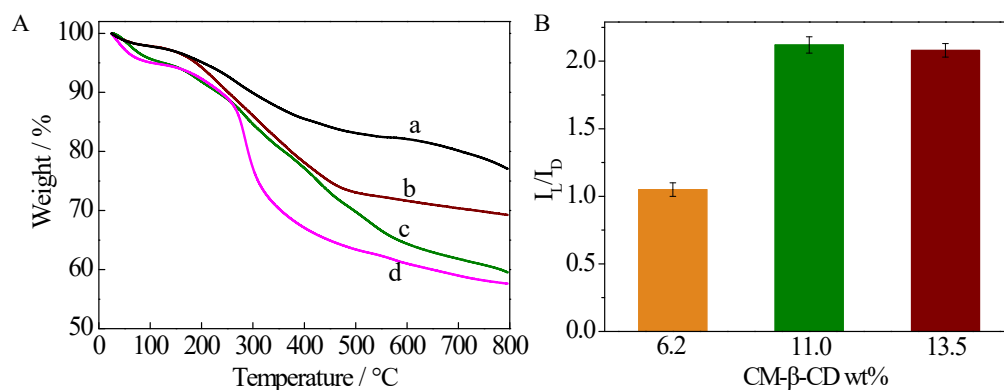

**Fig. S10** (A) TGA of 3D-rGO/Pd@Au (a) and 3D-rGO/Pd@Au/CM-β-CD containing different amounts of CM-β-CD (b-d); (B) The CM-β-CD amounts of 3D-rGO/Pd@Au/CM-β-CD influence on the recognition efficiency of 3D-rGO/Pd@Au/CM-β-CD/GCE toward Tyr isomers.

### **Influence of sweep speed**

The effects of scanning rate on 3D-rGO/Pd@Au/CM-β-CD/GCE for L-Tyr and D-Tyr were studied to resolve the surface characteristics of the developed sensor. As shown in Fig. S8, the electrochemical redox of Tyr enantiomers at 3D-rGO/Pd@Au/CM-β-CD/GCE is irreversible. The oxidation peak current of L- or D-Tyr linearly increased with an enhanced scan rate ( $v$ ) in the range of 10 to 100 mV/s. The linear equations of L-Tyr and D-Tyr are  $I_p = 0.043v + 0.0073$  ( $R^2 = 0.998$ ) and  $I_p = 0.032v + 0.2523$  ( $R^2 = 0.996$ ), respectively. The results indicated that the electrochemical sensor of L/D-Tyr at 3D-rGO/Pd@Au/CM-β-CD/GCE is an adsorption-control process [1]. As depicted in the insert curve of Fig. S8A and S8B, it can be seen that the slope of the linear regression equation of L-Tyr is greater than that of D-Tyr, which might be ascribed to the fact that the intermolecular interactions between the 3D-rGO/Pd@Au/CM-β-CD based interface and L-Tyr are relatively higher, resulting in higher peak currents. These results are also consistent with those of DPV (Fig. 4D).

### **Influence of the pH**

It should be pointed out that the pH values of the Tyr solutions greatly affect the electrochemical behavior of the designed 3D-rGO/Pd@Au/CM-β-CD/GCE in the oxidation process of Tyr, which turned out to be different chiral discrimination. As Fig. S9A shown, it is found that the peak current ratio of Tyr isomers ( $I_L/I_D$ ) first increased and then decreased in the pH range from 4.0 to 10.0, and the maximum of  $I_L/I_D$  occurs at pH 7.0, which is considered as the optimum pH for the experiment.

### **Influence of the accumulation time**

As shown in Fig. S9B, the accumulation time is important factor for enantio-recognition efficiency. The peak current ratio of  $I_L/I_D$  increases rapidly with the increase of incubation time in the beginning, and achieves to the maximum at 9 min, meaning that the adsorption equilibriums reached. Even so, it is observed that the  $I_L/I_D$  value decreases continuously with further increasing time. Thus, 9 min is selected as the optimum accumulation time to obtain the highest recognition efficiency of Tyr isomers in the present work.

### **Influence of the amount of 3D-rGO/Pd@Au/CM-β-CD**

The modification amount of 3D-rGO/Pd@Au/CM-β-CD dispersion also affects the

enantiorecognition efficiency of tyrosine isomers. By controlling the modification amount of 3D-rGO/Pd@Au/CM- $\beta$ -CD dispersion, the thickness of the sensor layer can be adjusted to change the electron transfer rate. It can be clearly observed that the oxidation peak has a maximum current value when the modification amount is 5  $\mu$ L (Fig. S9C). Therefore, 5  $\mu$ L is selected as a suitable volume drop of 3D-rGO/Pd@Au/CM- $\beta$ -CD and coated on the surface of GCE for detection.

#### **Optimizing the amount of CM- $\beta$ -CD carried by 3D-rGO/Pd@Au**

The recognition ability of the 3D-rGO/Pd@Au/CM- $\beta$ -CD chiral platform was simultaneously conjugated to the peculiarity of 3D-rGO/Pd@Au with excellent electrical conductivity and CM- $\beta$ -CD as chiral host for enantiorecognition. Therefore, it is noteworthy that the grafting amount of CM- $\beta$ -CD molecules onto the 3D-rGO/Pd@Au has a significant influence on the electrochemical discrimination of Tyr enantiomers. Three kinds of prepared 3D-rGO/Pd@Au/CM- $\beta$ -CD materials have been characterized by TGA, and the amounts of CM- $\beta$ -CD carried by 3D-rGO/Pd@Au were 6.2 wt%, 11.0 wt% and 13.5 wt%, respectively (Fig. S10A). Furthermore, the recognition efficiency ( $I_L/I_D$ ) of these three materials has been explored and recorded by DPV approach. As shown in Fig. S10B, the 3D-rGO/Pd@Au containing 11.0 wt% CM- $\beta$ -CD exhibits more prominent enantiorecognition ability than the 6.2 wt% 3D-rGO/Pd@Au/CM- $\beta$ -CD and similar with the 13.5 wt% 3D-rGO/Pd@Au/CM- $\beta$ -CD. The results illustrate that the appropriate amount of CM- $\beta$ -CD is beneficial for Tyr enantiomer recognition. Hence, 11.0 wt% of CM- $\beta$ -CD is selected as the optimum amount to obtain the good recognition efficiency of Tyr isomers in the present work.

#### **References**

1. Arvine A, Mahosenaho M, Pinteala M, et al. Electrochemical oxidation of p-nitrophenol using graphene-modified electrodes, and a comparison to the performance of MWNT-based electrodes. *Microchim Acta*, 2011, 174(3-4): 337-343.

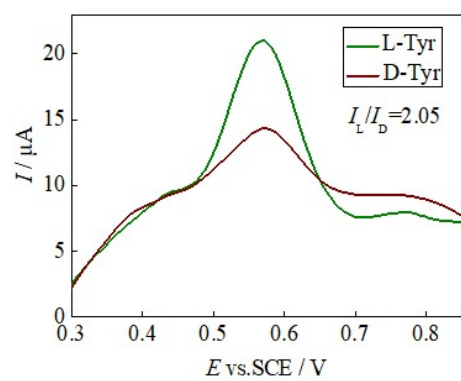

**Fig. S11** Differential pulse voltammograms of 1 mM L-Tyr and D-Tyr at 3D-rGO/CM-β-CD/GCE in 0.1 M PBS solution (pH 7.0).

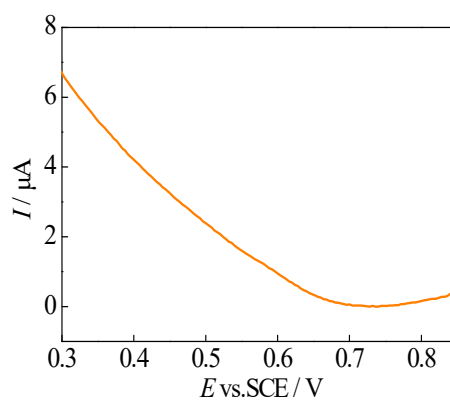

**Fig.S12** Differential pulse voltammograms of 3D-rGO/Pd@Au/CM-β-CD/GCE in 0.1 M PBS (pH 7.0).

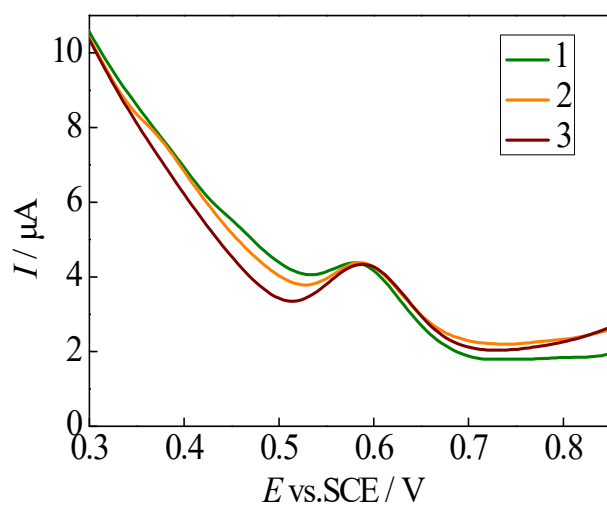

**Fig. S13** DPV plots of 3D-rGO/Pd@Au/CM-β-CD/GCE in pH 7.0 PBS containing 200 μM L-Tyr for reproducibility by using the three different batches of materials.

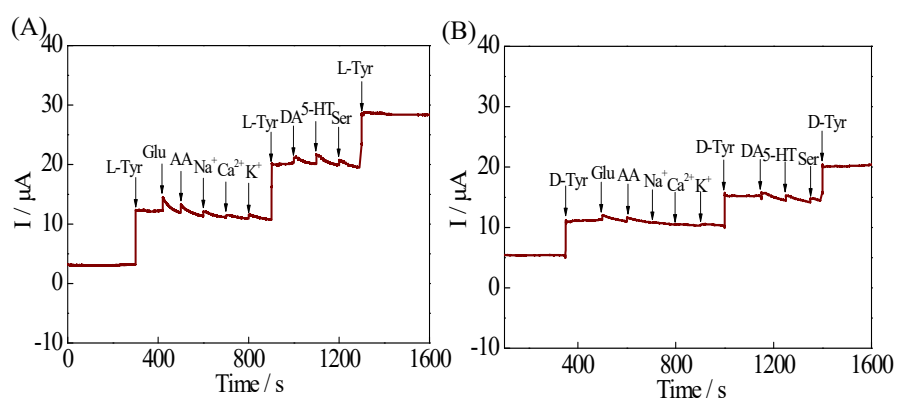

**Fig. S14** Amperometric responses of the 3D-rGO/Pd@Au/CM- $\beta$ -CD/GCE for the addition of 100  $\mu\text{M}$  L-Tyr (A) and 100  $\mu\text{M}$  D-Tyr (B) with 300  $\mu\text{M}$  Glu, AA,  $\text{Na}^+$ ,  $\text{Ca}^{2+}$ ,  $\text{K}^+$ , DA, 5-HT, Ser in 0.1 mol/L PBS (pH = 7.0).

**Table S1** Comparison of different chiral sensors in the recognition efficiency of Tyr enantiomers.

| Modified Electrode                                                                     | Method | Recognition difference<br>( $\Delta I$ , $\mu A$ ) | Linear range (mol L <sup>-1</sup> )            | LOD(mol L <sup>-1</sup> )                              | Ref.         |
|----------------------------------------------------------------------------------------|--------|----------------------------------------------------|------------------------------------------------|--------------------------------------------------------|--------------|
| MPC-SCD/GCE                                                                            | DPV    | $\Delta I = (I_D - I_L) = 1.12$                    | $1 \times 10^{-6} - 5 \times 10^{-4} (L/D)$    | $2.6 \times 10^{-7} (L)$<br>$2 \times 10^{-7} (D)$     | [41]         |
| rGO-CHMF/GCE/                                                                          | DPV    | $I_L/I_D = 1.58$                                   | $1 \times 10^{-7} - 1 \times 10^{-4} (L/D)$    | $7.8 \times 10^{-8} (L)$<br>$8.3 \times 10^{-8} (D)$   | [42]         |
| L-Cys-<br>Au/Fe <sub>3</sub> O <sub>4</sub> /MGCE                                      | SWV    | $I_L/I_D = 1.85$                                   | $1 \times 10^{-6} - 1.25 \times 10^{-3} (L/D)$ | $1.2 \times 10^{-8} (L)$<br>$8.4 \times 10^{-8} (D)$   | [43]         |
| SS-CS/GCE                                                                              | SWV    | $I_L/I_D = 1.38$                                   | $1 \times 10^{-5} - 1 \times 10^{-3} (L/D)$    | $3.5 \times 10^{-7} (L)$<br>$4.2 \times 10^{-7} (D)$   | [44]         |
| [(SA)Zn(II)(L/D-Tyr)]/GCE                                                              | CV     | $I_L/I_D = 1.24$                                   | -                                              | -                                                      | [45]         |
| GSH-Cu/Pt/GCE                                                                          | DPV    | $I_L/I_D = 5.11$                                   | -                                              | -                                                      | [46]         |
| CS-GaN/GCE                                                                             | SWV    | $I_L/I_D = 1.70$                                   | $1 \times 10^{-5} - 1 \times 10^{-4} (L/D)$    | $6.5 \times 10^{-7} (L)$<br>$8.6 \times 10^{-7} (D)$   | [47]         |
| SGO-NH <sub>2</sub> - $\beta$ -<br>CD/BPNSs/GCE                                        | SWV    | $I_D/I_L = 1.94$                                   | $1 \times 10^{-5} - 1 \times 10^{-3} (L/D)$    | $1.74 \times 10^{-6} (L)$<br>$1.02 \times 10^{-7} (D)$ | [48]         |
| CS-SA/GCE                                                                              | SWV    | $I_L/I_D = 1.63$                                   | -                                              | -                                                      | [49]         |
| $\alpha$ -Fe <sub>2</sub> O <sub>3</sub> @Co <sub>3</sub> O <sub>4</sub> -<br>NRGO/CCE | SDLSV  | -                                                  | $1 \times 10^{-8} - 1 \times 10^{-5} (L/D)$    | $8 \times 10^{-9} (L/D)$                               | [50]         |
| 3D-rGO/Pd@Au/CM-<br>$\beta$ -CD/GCE                                                    | DPV    | $I_L/I_D = 2.12$                                   | $8 \times 10^{-7} - 1.3 \times 10^{-4} (L/D)$  | $5.2 \times 10^{-8} (L)$<br>$9.6 \times 10^{-8} (D)$   | This<br>work |

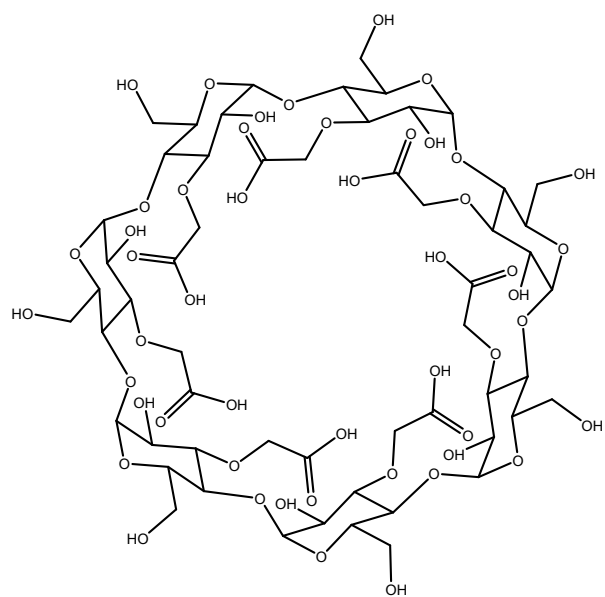

**Fig. S15** The structure of CM-β-CD.

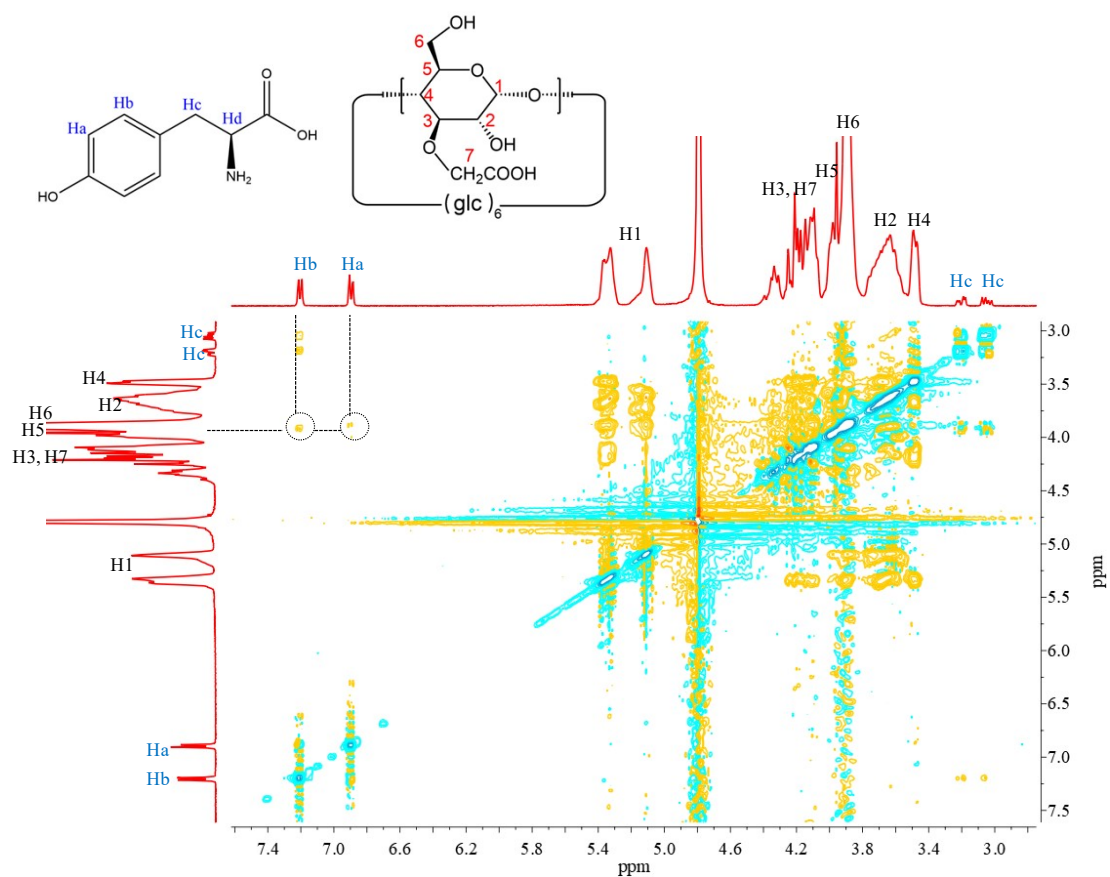

**Fig. S16** ROESY spectrum of an equimolar mixture of L-Tyr (2.5 mM) and CM-β-CD (2.5 mM) in D<sub>2</sub>O

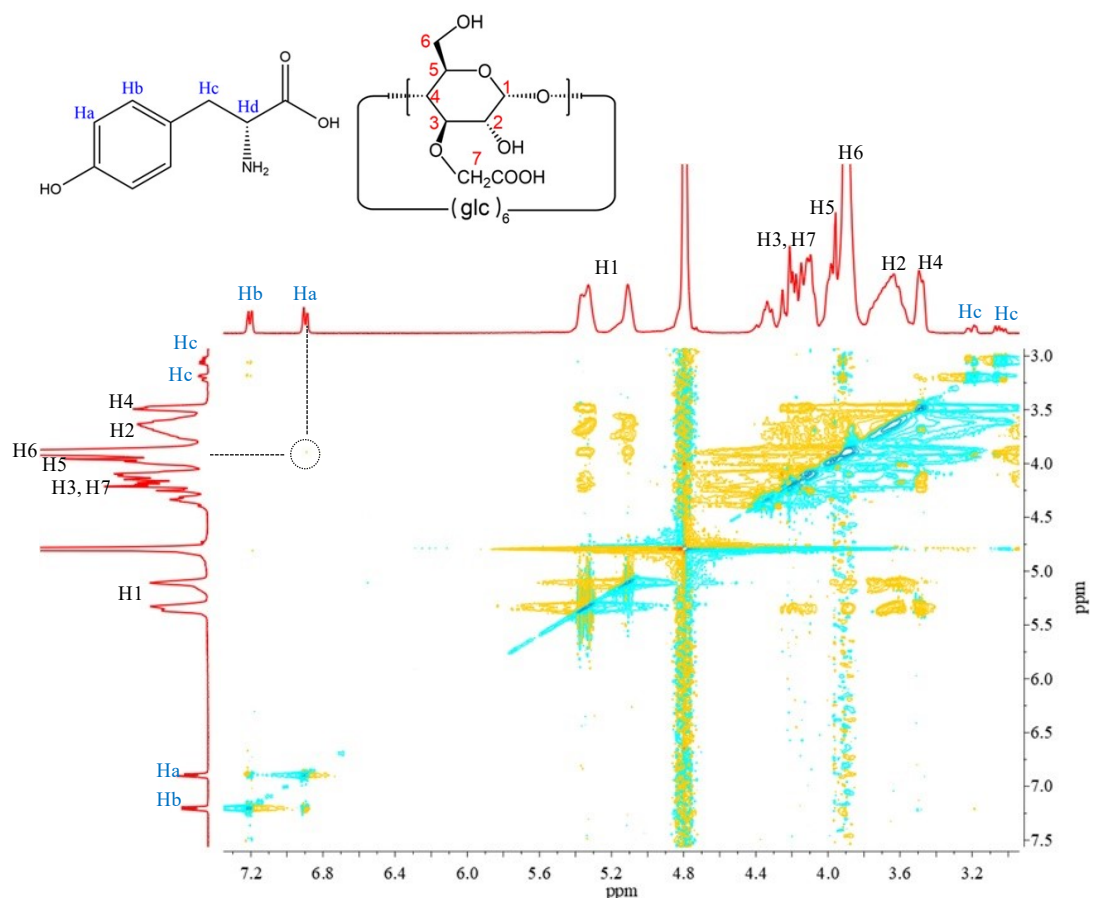

**Fig. S17** ROESY spectrum of an equimolar mixture of D-Tyr (2.5 mM) and CM-β-CD (2.5 mM) in D<sub>2</sub>O

Enantiomeric excess (% ee) is an invaluable parameter for the estimation of the success of chemical processes occurring in these fields since it defines the purity of non-racemic mixtures of chiral compounds. It is usually defined as:

$$\% ee = \frac{[R]_t - [S]_t}{[R]_t + [S]_t} \times 100 \%$$

where  $[R]_t$  and  $[S]_t$  are the respective total analytical concentrations of the (R)- and (S)-enantiomers of analyte (guest).

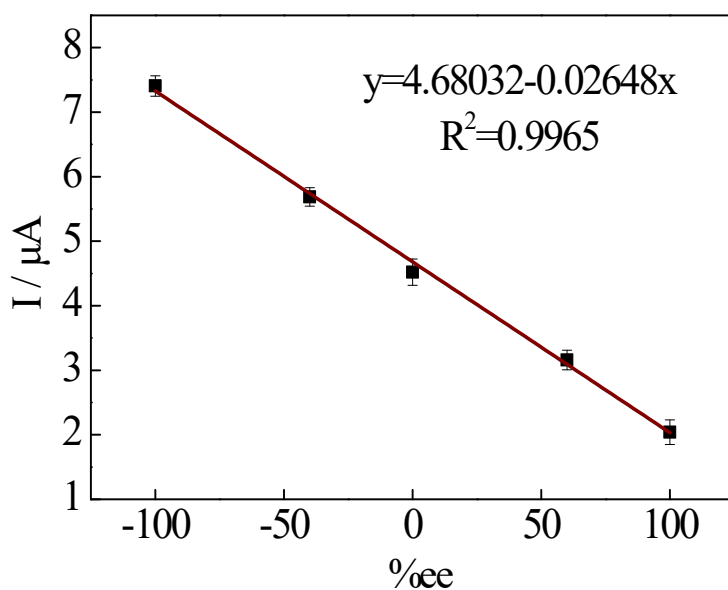

**Fig. S18** Linear relationship between  $I_A$  and % ee in the mixture of Tyr isomers (1 mM).
